# Supplementary material for: Effects of temperature on the composition and diversity of bacterial communities in bamboo soils at different elevations
Source: Copernicus journal article supplement (doi:10.5194/bg-14-4879-2017), 2017-11-06
Supplement: Supplementary file 1 [file bg-14-4879-2017-supplement.zip]

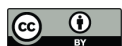

## *Supplement of*

# **Effects of temperature on the composition and diversity of bacterial communities in bamboo soils at different elevations**

**Yu-Te Lin et al.**

*Correspondence to:* Zhongjun Jia ([jia@issas.ac.cn](mailto:jia@issas.ac.cn)) and Chih-Yu Chiu ([bochiu@sinica.edu.tw](mailto:bochiu@sinica.edu.tw))

- [bg-14-4879-2017-supplement-title-page.pdf](#)
- [Supp-Fig1.jpg](#)

The copyright of individual parts of the supplement might differ from the CC BY 3.0 License.
