# Supplementary material for: Effects of temperature on the composition and diversity of bacterial communities in bamboo soils at different elevations
Source: Copernicus journal article supplement (doi:10.5194/bg-14-4879-2017), 2017-11-06
Supplement: Supplementary file 2 [file bg-14-4879-2017-supplement.zip]

Archive with 2 entries (2 files):
- bg-14-4879-2017-supplement-title-page.pdf
- Supp-Fig1.jpg
