# Supplementary figures and images for: Effects of temperature on the composition and diversity of bacterial communities in bamboo soils at different elevations
Source: Copernicus journal article supplement (doi:10.5194/bg-14-4879-2017), 2017-11-06

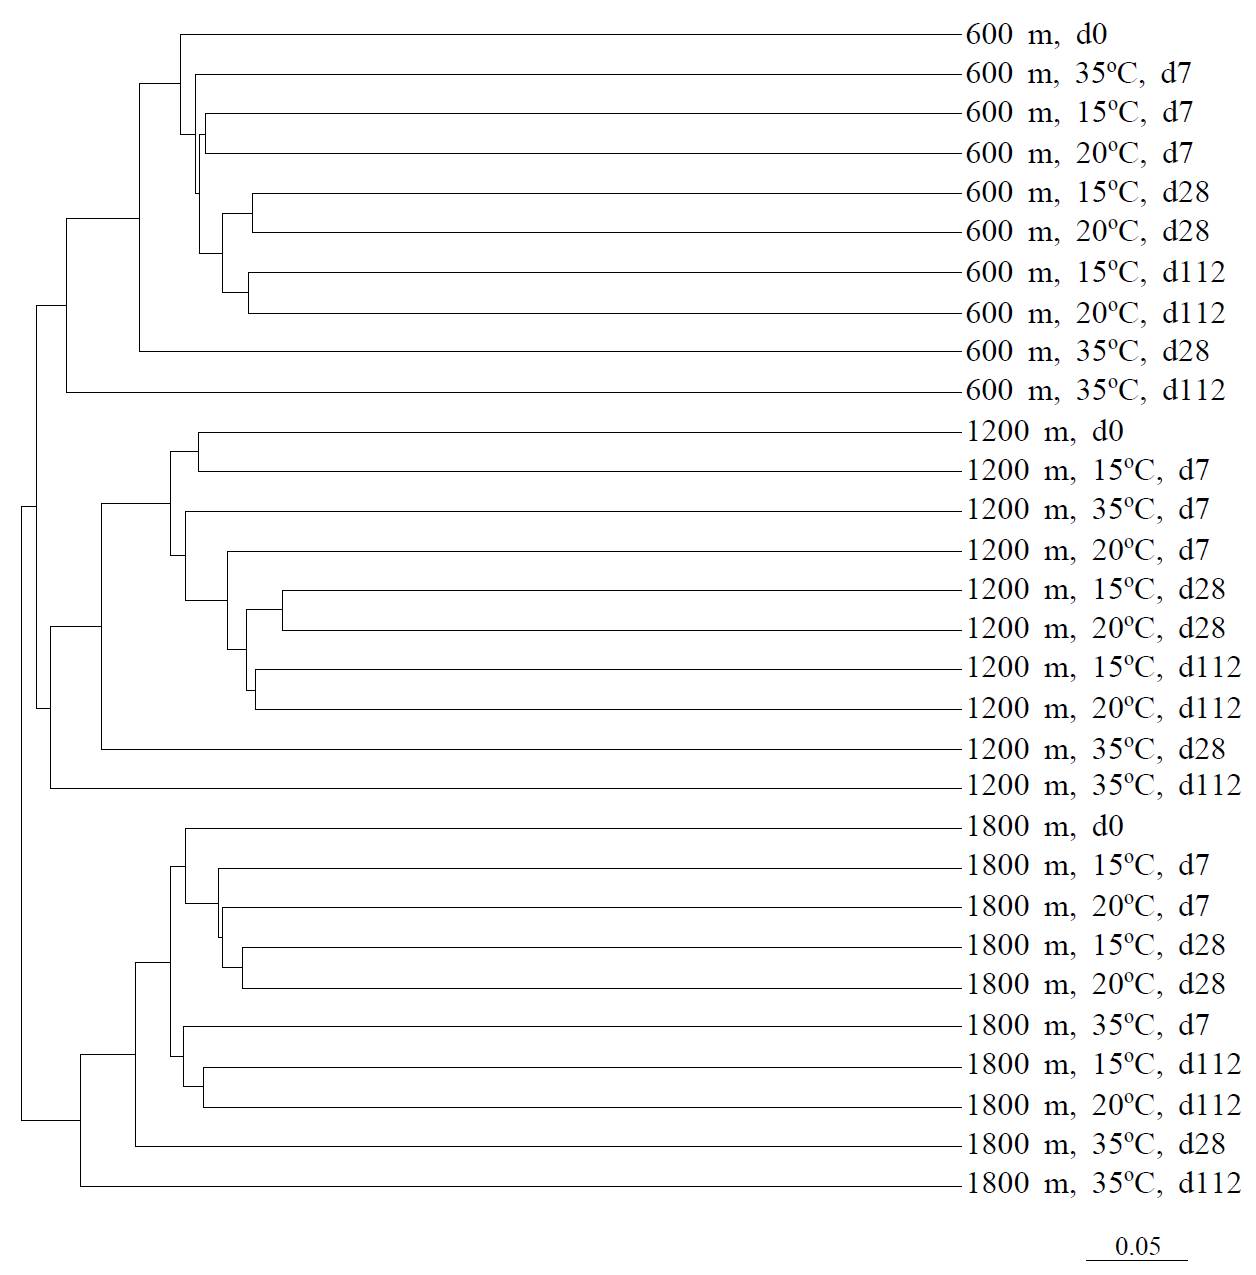

Supplement: Supplementary file 2 [file bg-14-4879-2017-supplement.zip › Supp-Fig1.jpg]
